# Supplementary material for: Four‐year follow‐up of weight loss maintenance using electronic medical record data: The PROPEL trial
Source: PubMed Central journal article supplement (PMC11490219; doi:10.1002/osp4.70017), 2024-10-19
Supplement: OSP4-10-e70017-s001.pdf [file OSP4-10-e70017-s001.pdf]

**Four-Year Follow-up of Weight Loss Maintenance Using Electronic  
Medical Record Data: The PROPEL Trial**

Peter T. Katzmarzyk, PhD<sup>1</sup>, Emily F. Mire, MS<sup>1</sup>, Ronald Horswell, PhD<sup>1</sup>, San T. Chu, MS<sup>1</sup>,  
Dachuan Zhang, MS<sup>1</sup>, Corby K. Martin, PhD<sup>1</sup>, Robert L. Newton, Jr., PhD<sup>1</sup>, John W. Apolzan,  
PhD<sup>1</sup>, Eboni G. Price-Haywood, MD, MPH<sup>2,3</sup>, Dan Fort, PhD<sup>3</sup>, Thomas W. Carton, PhD<sup>4</sup>, and  
Kara D. Denstel, PhD, MPH<sup>1</sup> for the PROPEL Research Group

<sup>1</sup>Pennington Biomedical Research Center, Baton Rouge, LA

<sup>2</sup>Ochsner Xavier Institute for Health Equity and Research, New Orleans, LA

<sup>3</sup>Ochsner Center for Outcomes Research, Division of Academics, Ochsner Health,  
New Orleans, LA

<sup>4</sup>Louisiana Public Health Institute, New Orleans, LA

**Table S1.** Comparison of baseline descriptive characteristics among PROPEL patients with and without EMR follow-up data.

|                               | <b>Patients with EMR Follow-Up</b> | <b>Patients without EMR Follow-Up</b> | <b>P for Difference*</b> |
|-------------------------------|------------------------------------|---------------------------------------|--------------------------|
| <b>Patients, n</b>            | 307                                | 496                                   |                          |
| <b>Age, y</b>                 | 54.1 (11.8)                        | 46.5 (13.0)                           | <0.0001                  |
| <b>Weight, kg</b>             | 103.0 (18.2)                       | 101.5 (15.6)                          | 0.21                     |
| <b>BMI, kg/m<sup>2</sup></b>  | 37.1 (4.7)                         | 37.3 (4.6)                            | 0.45                     |
| <b>Female Sex, n (%)</b>      | 232 (75.6)                         | 446 (89.9)                            | <0.0001                  |
| <b>Race, n (%)</b>            |                                    |                                       | 0.59                     |
| <b>Black</b>                  | 203 (66.1)                         | 337 (67.9)                            |                          |
| <b>White</b>                  | 88 (28.7)                          | 120 (24.2)                            |                          |
| <b>Other</b>                  | 16 (5.2)                           | 39 (7.9)                              |                          |
| <b>Hispanic, n (%)</b>        | 15 (4.9)                           | 17 (3.4)                              | 0.30                     |
| <b>Income, n (%)</b>          |                                    |                                       | <0.0001                  |
| <b>&lt;\$10,000</b>           | 41 (13.4)                          | 115 (23.2)                            |                          |
| <b>\$10-19,999</b>            | 50 (16.3)                          | 118 (23.8)                            |                          |
| <b>\$20-39,999</b>            | 72 (23.5)                          | 119 (24.0)                            |                          |
| <b>\$40-59,999</b>            | 47 (15.3)                          | 70 (14.1)                             |                          |
| <b>≥\$60,000</b>              | 90 (29.3)                          | 64 (12.9)                             |                          |
| <b>Missing</b>                | 7 (2.3)                            | 10 (2.0)                              |                          |
| <b>Health Literacy, n (%)</b> |                                    |                                       | 0.93                     |
| <b>≤8<sup>th</sup> grade</b>  | 95 (30.9)                          | 152 (30.7)                            |                          |
| <b>≥9<sup>th</sup> grade</b>  | 212 (69.1)                         | 344 (69.4)                            |                          |
| <b>Food Insecurity, n (%)</b> | 98 (31.9)                          | 149 (30.0)                            | 0.57                     |
| <b>Diabetes, n (%)</b>        | 95 (30.9)                          | 112 (22.5)                            | 0.009                    |

\*Significant differences were determined with a two-samples t-test for continuous variables and a chi-square test for categorical variables.

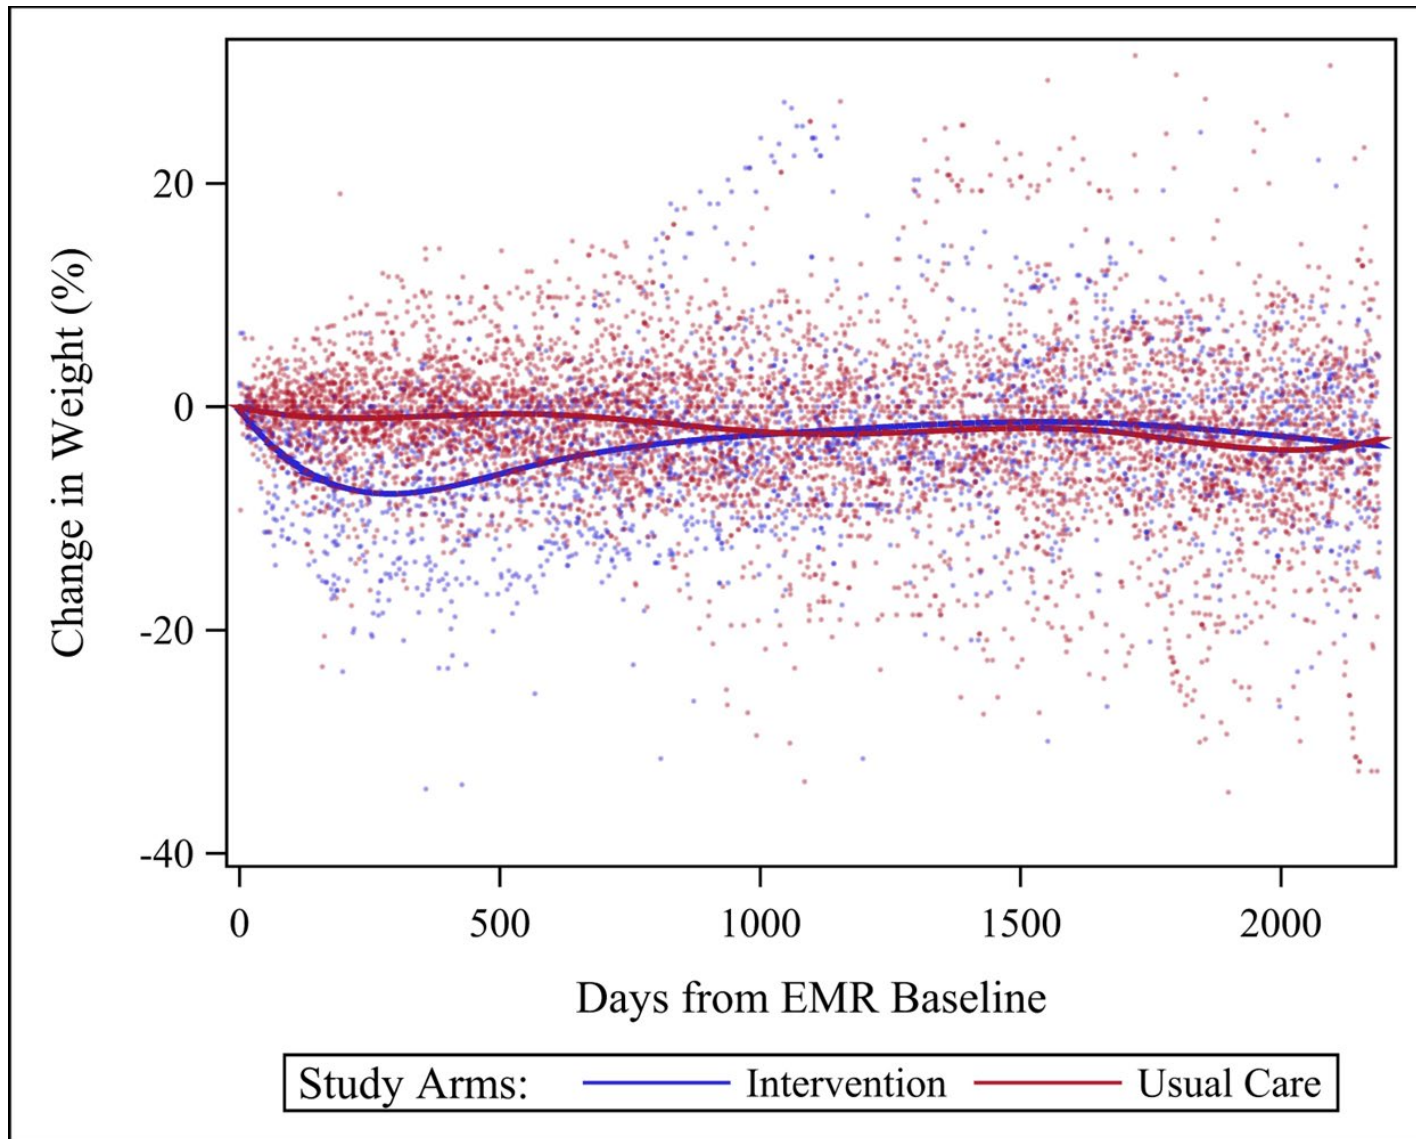

**Figure S1.** Individual data points and trends over time in the Intensive Lifestyle Intervention and Usual Care groups. Data obtained from electronic medical records (EMRs).

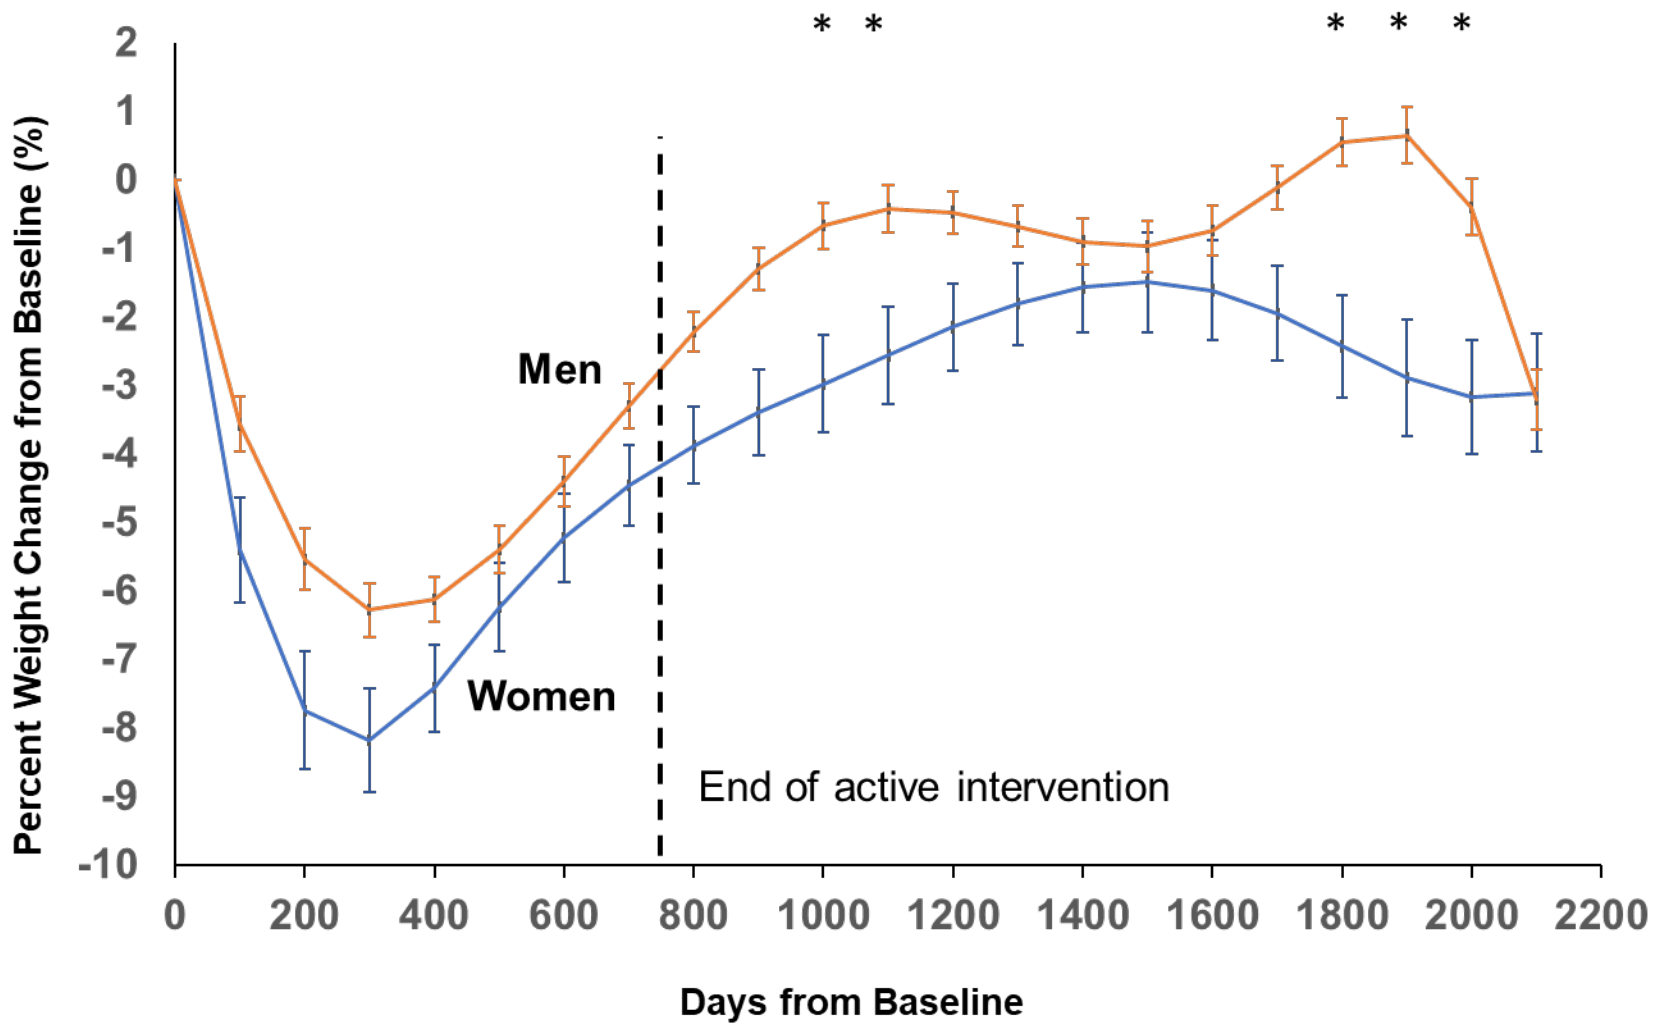

**Figure S2.** Percent weight loss from baseline in men and women. Error bars represent standard errors. The vertical dotted line indicates the end of the active study phase; \*P<0.05 between groups.

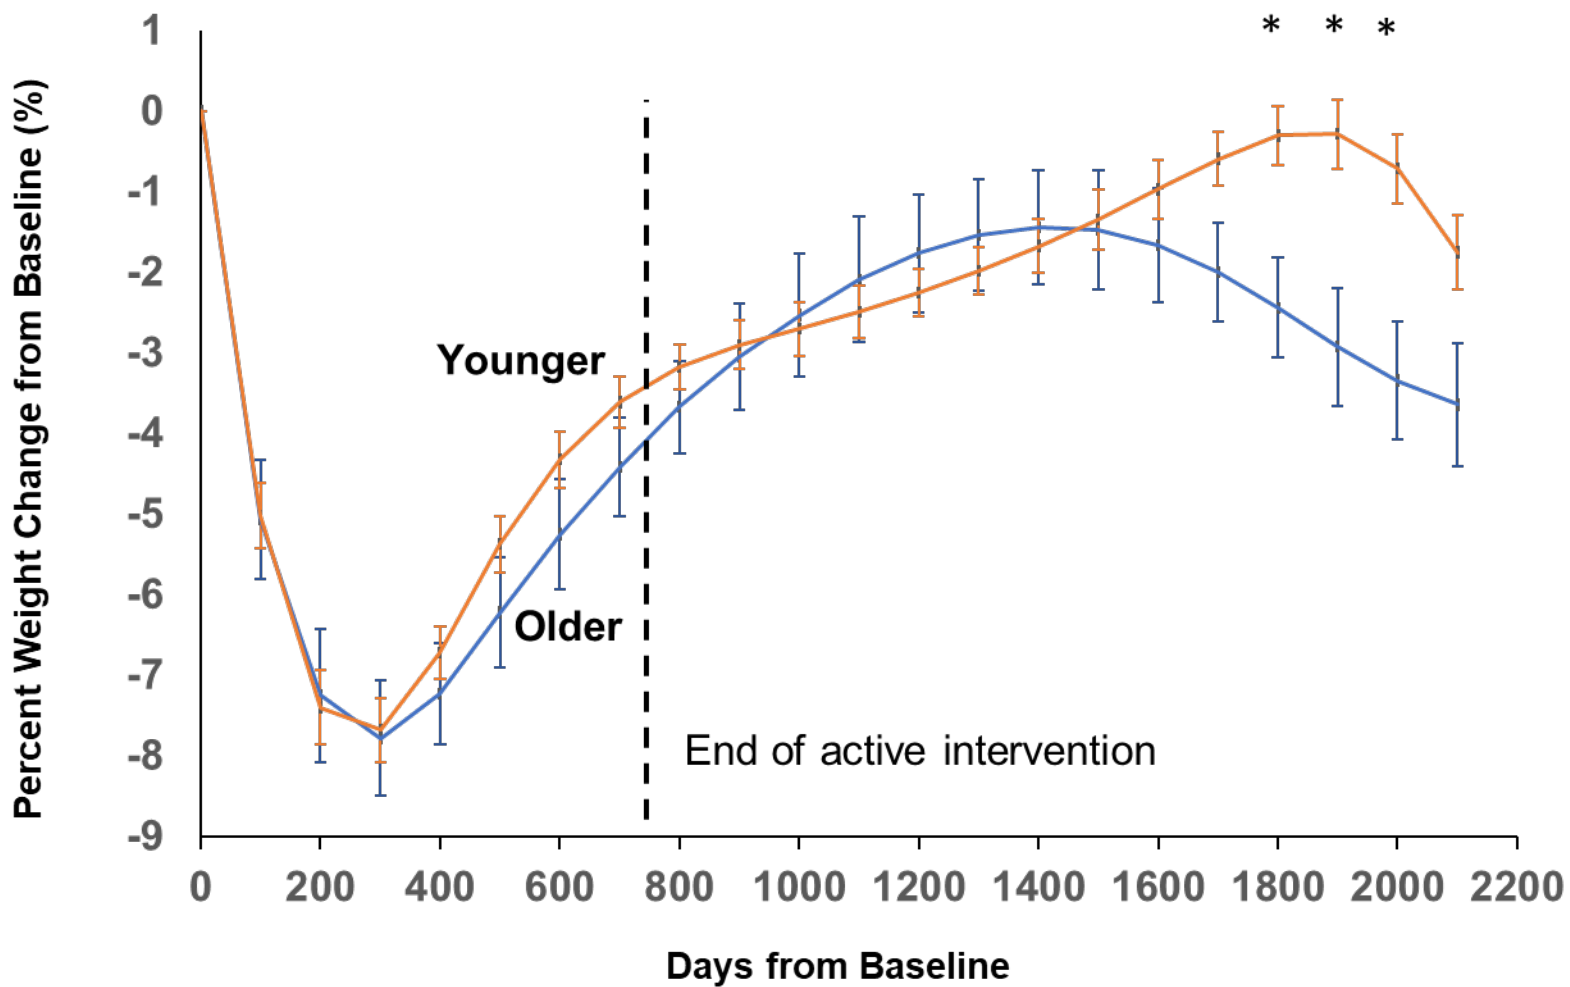

**Figure S3.** Percent weight loss from baseline in younger (<52 y) and older (≥52 y) age groups. Error bars represent standard errors. The vertical dotted line indicates the end of the active study phase; \*P<0.05 between groups.

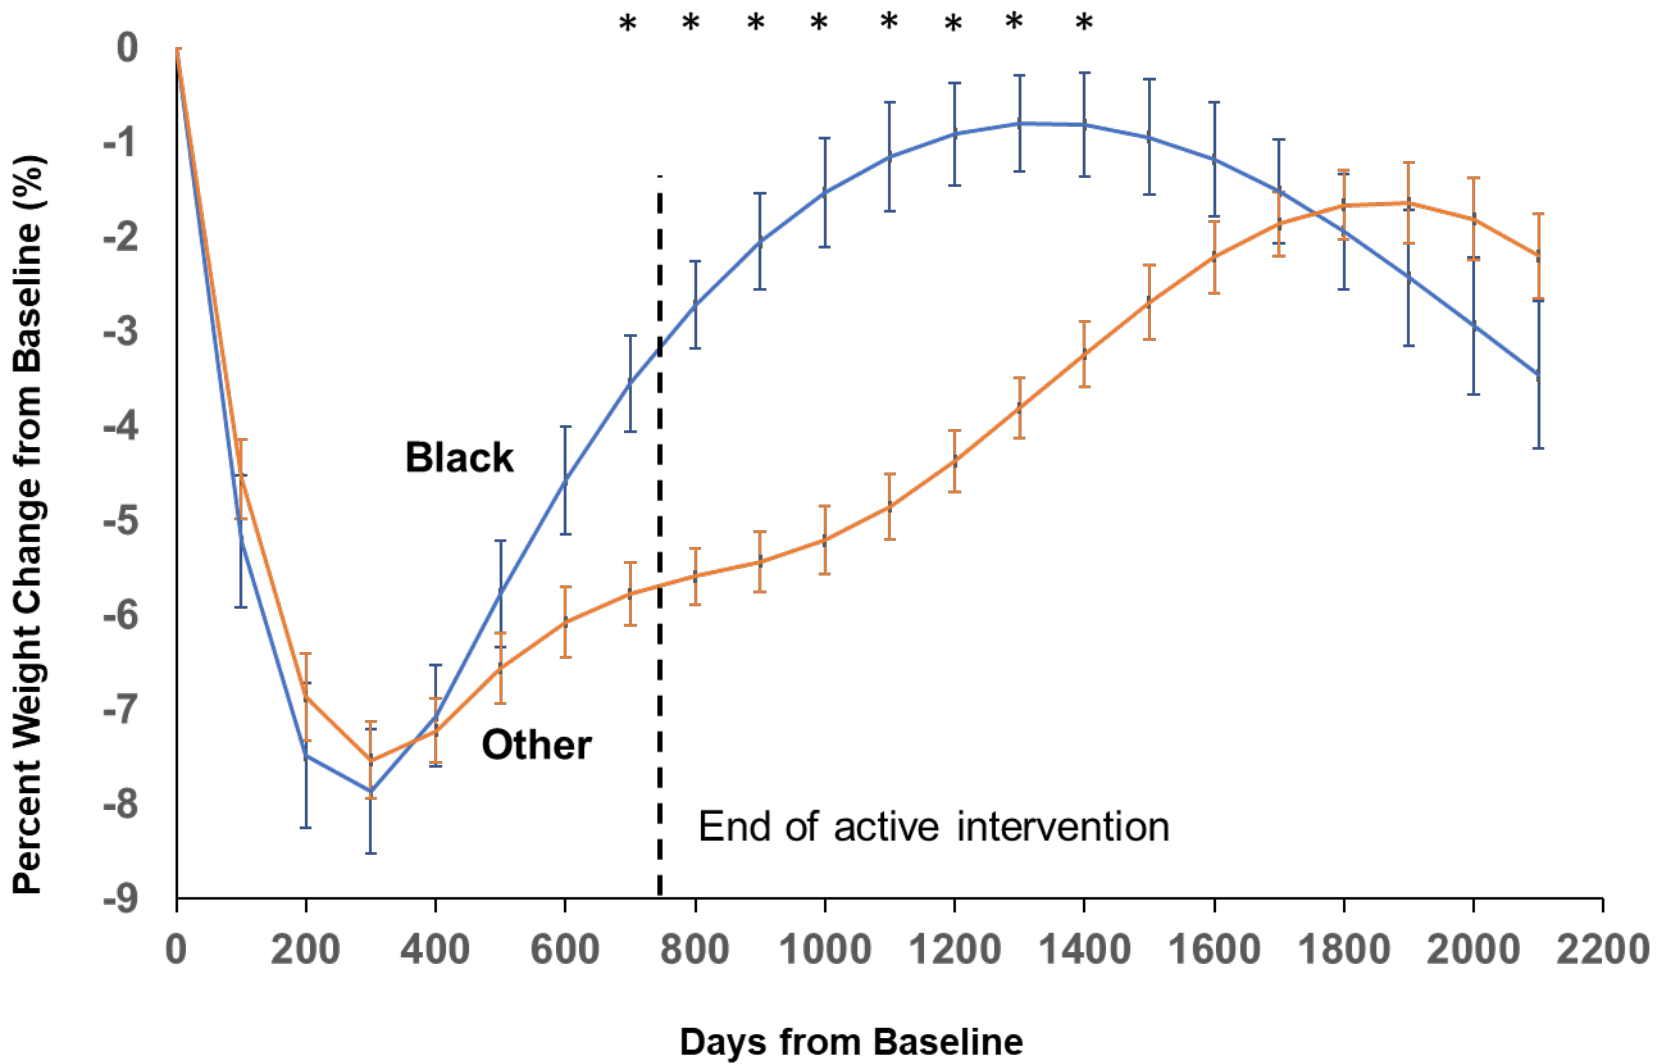

**Figure S4.** Percent weight loss from baseline in Black and Other races. Error bars represent standard errors. The vertical dotted line indicates the end of the active study phase; \*P<0.05 between groups.
